# Supplementary material
Source: PubMed Central journal article supplement (PMC7610351)
Supplement: EMS117976-supplement-Supplementary_Table_2.pdf [file EMS117976-supplement-Supplementary_Table_2.pdf]

**Supplementary Table 2. List of plasmids used for the study.**

| Gene                  | Backbone           | Tag      | Mutation                                 | Resource               | Reference |
|-----------------------|--------------------|----------|------------------------------------------|------------------------|-----------|
| CFL1                  | pCMV6-Entry        | Flag-Myc | -                                        | ORIGENE                | -         |
| CHCHD3                | pCMV6-Entry        | Flag-Myc | -                                        | ORIGENE                | -         |
| EFHD2                 | pCMV6-Entry        | Flag-Myc | -                                        | ORIGENE                | -         |
| KHDRBS1               | pCMV6-Entry        | Flag-Myc | -                                        | ORIGENE                | -         |
| LASPI                 | pCMV6-Entry        | Flag-Myc | -                                        | ORIGENE                | -         |
| LIMA1                 | pCMV6-Entry        | Flag-Myc | -                                        | ORIGENE                | -         |
| PPIL3                 | pCMV6-Entry        | Flag-Myc | -                                        | ORIGENE                | -         |
| STEEP                 | pCMV6-AC           | -        | -                                        | ORIGENE                | -         |
| TBK1                  | pcDNA3             | Flag     | -                                        | Soren R Paludan        | -         |
| TRIF                  | pcDNA3             | -        | -                                        | Soren R Paludan        | -         |
| MAVS                  | pcDNA3             | -        | -                                        | Soren R Paludan        | -         |
| cGAS                  | pcDNA3             | Flag     | -                                        | Soren R Paludan        | -         |
| IRF3                  | pcDNA3             | -        | S396D, S398D, S402D,<br>T404D, and S405D | Soren R Paludan        | -         |
| STING                 | pCMV-Tag 4         | Flag     | -                                        | Soren R Paludan        | -         |
| STEEP                 | pCMV6-AN-HA        | HA       | -                                        | Soren R Paludan        | -         |
| STEEP                 | pCMV6-AN-HA        | HA       | R7A                                      | Soren R Paludan        | -         |
| STEEP                 | pCMV6-AN-HA        | HA       | Y30A,C34A                                | Soren R Paludan        | -         |
| STEEP                 | pCMV6-AN-HA        | HA       | R51A,D54A,V58A                           | Soren R Paludan        | -         |
| STEEP                 | pCMV6-AN-HA        | HA       | E86A, C93A,C96A                          | Soren R Paludan        | -         |
| STEEP                 | pCMV6-AN-HA        | HA       | K149A,G152A,E166A,<br>E168A,Y178A        | Soren R Paludan        | -         |
| Ubiquitin             | pRK5-HA            | HA       | K11 only                                 | Ted Dawson             | 1         |
| Ubiquitin             | pRK5-HA            | HA       | K27 only                                 | Ted Dawson             | 1         |
| Ubiquitin             | pRK5-HA            | HA       | K29 only                                 | Ted Dawson             | 1         |
| Ubiquitin             | pRK5-HA            | HA       | K33 only                                 | Ted Dawson             | 1         |
| Ubiquitin             | pRK5-HA            | HA       | K48 only                                 | Ted Dawson             | 1         |
| Ubiquitin             | pRK5-HA            | HA       | K63 only                                 | Ted Dawson             | 1         |
| hVps34                | pVitro2            | His, V5  | -                                        | Jonathan Backer        | 2         |
| hVps15                | -                  | -        | -                                        | -                      | -         |
| pCI-neo-<br>HA-hAtg14 | pCI-neo HA Ci3     | HA       | -                                        | Noboru Mizushima       | 3         |
| UVRAG                 | pRK5               | HA       | -                                        | Do-Hyung Kim           | 4         |
| Beclin 1              | pRK5               | HA       | -                                        | Do-Hyung Kim           | 5         |
| Beclin 1              | pCDNA4 -<br>3xflag | Flag     | -                                        | Qing Zhong             | 6         |
| SAR1                  | pCMV6-Entry        | Flag     | -                                        | ORIGENE                | -         |
| SAR1                  | pCMV6-Entry        | Flag     | H79G                                     | Soren R Paludan        | -         |
| GFP <sup>133</sup>    | pEGFP-N1           | GFP      | -                                        | Christine M.<br>Doucet | 7         |
| GFP-FYVE              | peGFPC2            | GFP      | -                                        | Harald Stenmark        | 8         |
| MTMR3                 | mStrawberry-C2     | mCherry  | -                                        | Takeshi Noda           | 9         |
| MTMR3                 | mStrawberry-C2     | mCherry  | C143S                                    | Takeshi Noda           | 9         |
| STING                 | pcDNA3             | Flag     | -                                        | Zhijian J Chen         | 10        |
| STING                 | pcDNA3             | Flag     | R238A,240A                               | Zhijian J Chen         | 10        |
| STING                 | pcDNA3             | Flag     | Q273A,Q277A                              | Zhijian J Chen         | 10        |
| STING                 | pcDNA3             | Flag     | L374A, R375A                             | Zhijian J Chen         | 11        |
| STING                 | pcDNA3             | Flag     | V155M                                    | Zhijian J Chen         | 11        |
| STING                 | pcDNA3             | Flag     | G158A                                    | Zhijian J Chen         | 11        |
| VSVG                  | pcDNA3             | mCherry  | -                                        | Jacob G Mikkelsen      | -         |

|       |                    |     |   |                 |   |
|-------|--------------------|-----|---|-----------------|---|
| ATG14 | pCMV3-<br>GFPSpark | GFP | - | Sino Biological | - |
| UVRAG | pCMV3-<br>GFPSpark | GFP | - | Sino Biological | - |

- Parkin mediates nonclassical, proteasomal-independent ubiquitination of synphilin-1: implications for Lewy body formation.** Lim KL, Chew KC, Tan JM, Wang C, Chung KK, Zhang Y, Tanaka Y, Smith W, Engelender S, Ross CA, Dawson VL, Dawson TM. *J Neurosci.* 2005 Feb 23. 25(8):2002-9. 10.1523/JNEUROSCI.4474-04.2005 [PubMed 15728840](#)
- hVps15, but not Ca<sup>2+</sup>/CaM, is required for the activity and regulation of hVps34 in mammalian cells.** Yan Y, Flinn RJ, Wu H, Schnur RS, Backer JM. *Biochem J.* 2009 Feb 1. 417(3):747-55. 10.1042/BJ20081865 [PubMed 18957027](#)
- mTORC1 phosphorylates UVRAG to negatively regulate autophagosome and endosome maturation.** Kim YM, Jung CH, Seo M, Kim EK, Park JM, Bae SS, Kim DH. *Mol Cell.* 2015 Jan 22;57(2):207-18. doi: 10.1016/j.molcel.2014.11.013. Epub 2014 Dec 18. 10.1016/j.molcel.2014.11.013 [PubMed 25533187](#)
- Beclin 1 forms two distinct phosphatidylinositol 3-kinase complexes with mammalian Atg14 and UVRAG.** Itakura E, Kishi C, Inoue K, Mizushima N. *Mol Biol Cell.* 2008 Dec . 19(12):5360-72. 10.1091/mbc.e08-01-0080 [PubMed 18843052](#)
- The ULK1 complex mediates MTORC1 signaling to the autophagy initiation machinery via binding and phosphorylating ATG14.** Park JM, Jung CH, Seo M, Otto NM, Grunwald D, Kim KH, Moriarity B, Kim YM, Starker C, Nho RS, Voytas D, Kim DH. *Autophagy.* 2016;12(3):547-64. doi: 10.1080/15548627.2016.1140293. 10.1080/15548627.2016.1140293 [PubMed 27046250](#)
- Identification of Barkor as a mammalian autophagy-specific factor for Beclin 1 and class III phosphatidylinositol 3-kinase.** Sun Q, Fan W, Chen K, Ding X, Chen S, Zhong Q. *Proc Natl Acad Sci U S A.* 2008 Dec 9. 105(49):19211-6. 10.1073/pnas.0810452105 [PubMed 19050071](#)
- Doucet, Christine M., et al. "Membrane curvature sensing by amphipathic helices is modulated by the surrounding protein backbone." *PloS one* 10.9 (2015): e0137965.
- Raiborg, Camilla, et al. "Repeated ER–endosome contacts promote endosome translocation and neurite outgrowth." *Nature* 520.7546 (2015): 234.
- Taguchi-Atarashi, Naoko, et al. "Modulation of local PtdIns3P levels by the PI phosphatase MTMR3 regulates constitutive autophagy." *Traffic* 11.4 (2010): 468-478.
- Shang, Guijun, et al. "Cryo-EM structures of STING reveal its mechanism of activation by cyclic GMP–AMP." *Nature* 567.7748 (2019): 389.
- Zhang, Conggang, et al. "Structural basis of STING binding with and phosphorylation by TBK1." *Nature* 567.7748 (2019): 394.
