# Supplementary material
Source: PubMed Central journal article supplement (PMC7610351)

Fig S1e

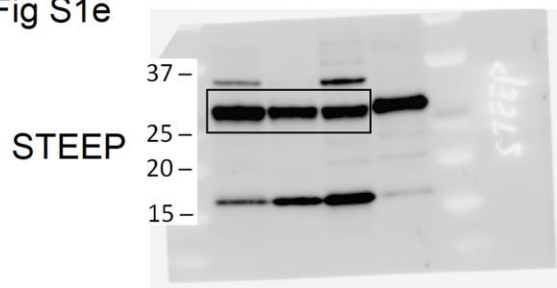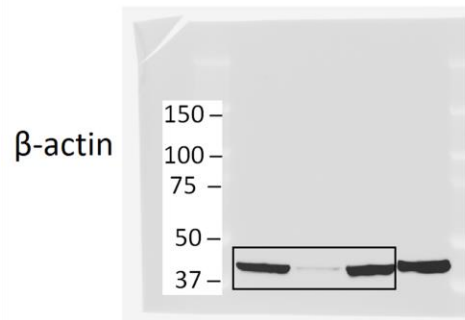

Supplement: EMS117976-supplement-Unprocessed_Immunoblots_ED_Fig_1.pdf [file EMS117976-supplement-Unprocessed_Immunoblots_ED_Fig_1.pdf]

Fig S2b

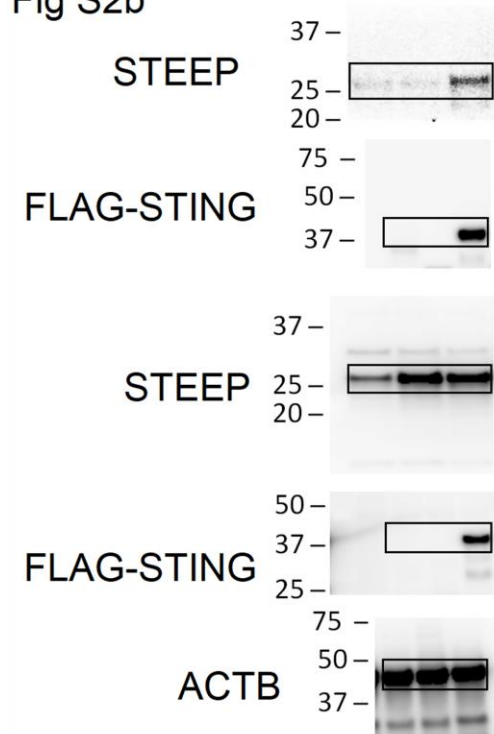

Supplement: EMS117976-supplement-Unprocessed_Immunoblots_ED_Fig_2.pdf [file EMS117976-supplement-Unprocessed_Immunoblots_ED_Fig_2.pdf]

Fig S3b

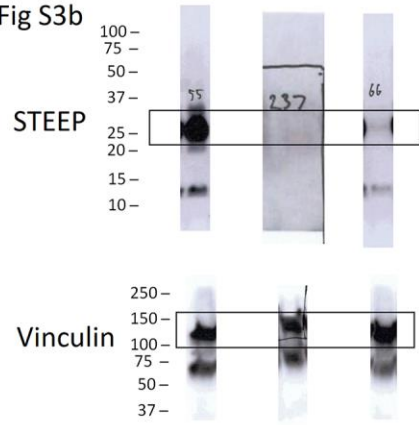

FigS3c

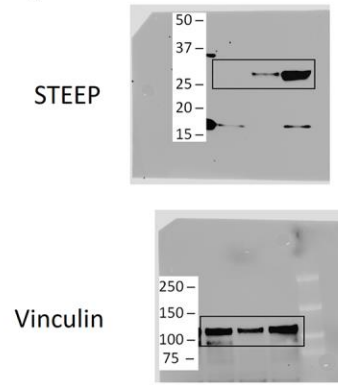

Supplement: EMS117976-supplement-Unprocessed_Immunoblots_ED_Fig_3.pdf [file EMS117976-supplement-Unprocessed_Immunoblots_ED_Fig_3.pdf]

FigS4a

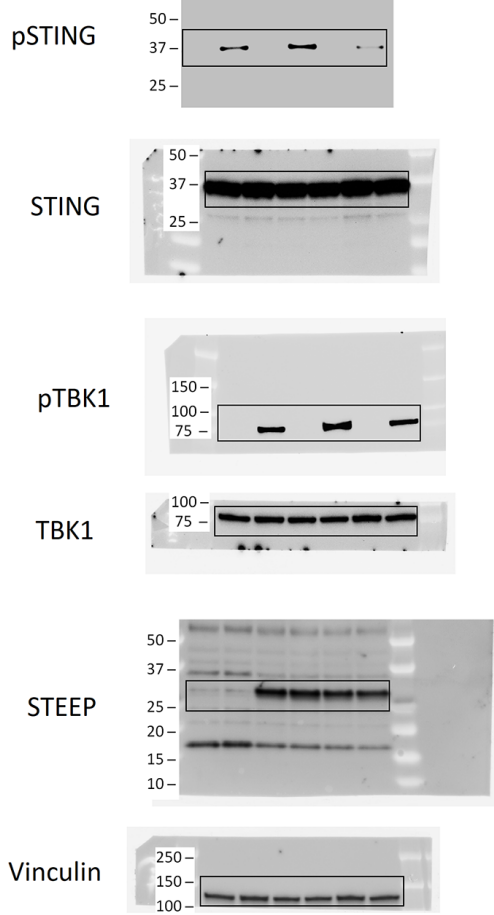

FigS4b

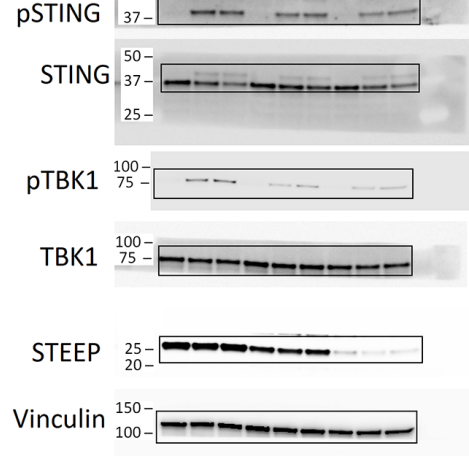

FigS4c

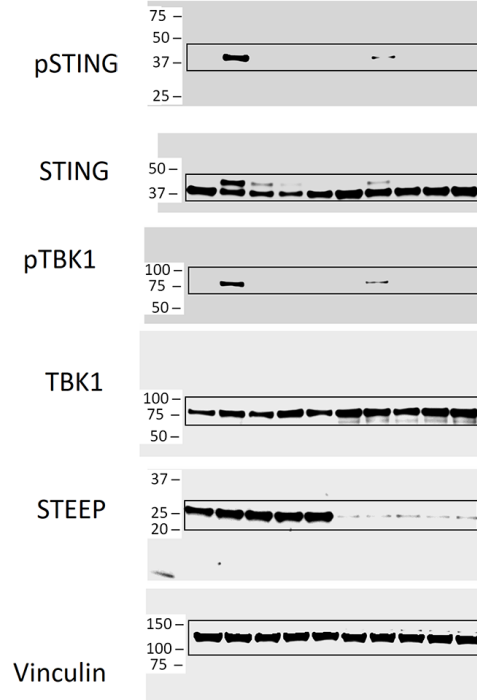

Supplement: EMS117976-supplement-Unprocessed_Immunoblots_ED_Fig_4.pdf [file EMS117976-supplement-Unprocessed_Immunoblots_ED_Fig_4.pdf]

Fig S5a

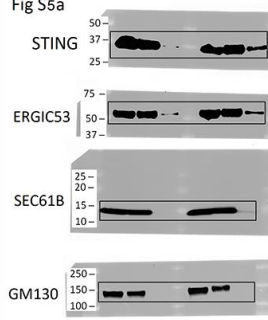

Fig S5d

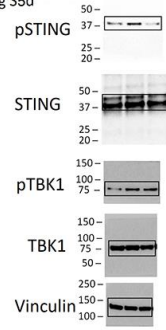

Fig S5g

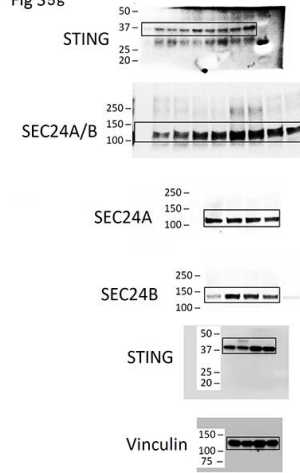

Fig S5i

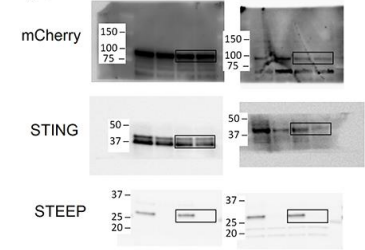

Fig S5p

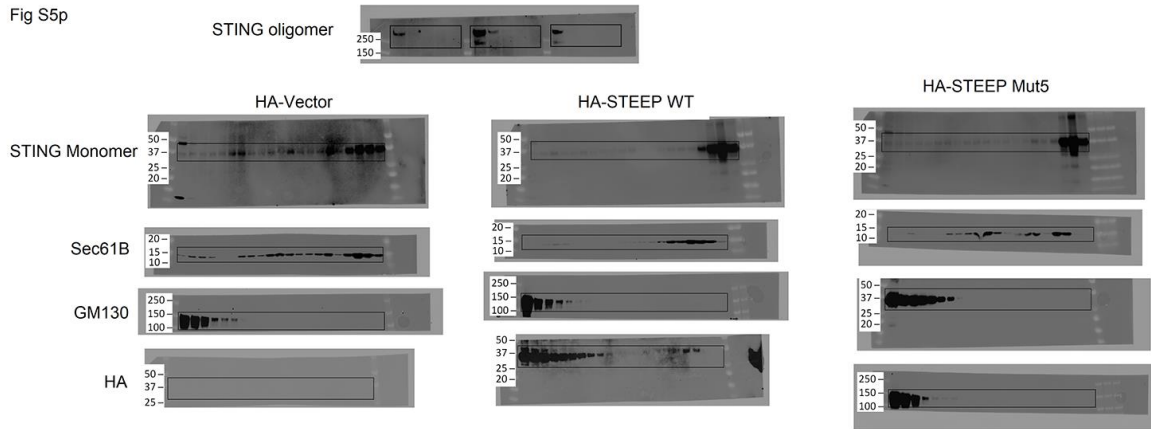

Supplement: EMS117976-supplement-Unprocessed_Immunoblots_ED_Fig_5.pdf [file EMS117976-supplement-Unprocessed_Immunoblots_ED_Fig_5.pdf]

Fig S6e

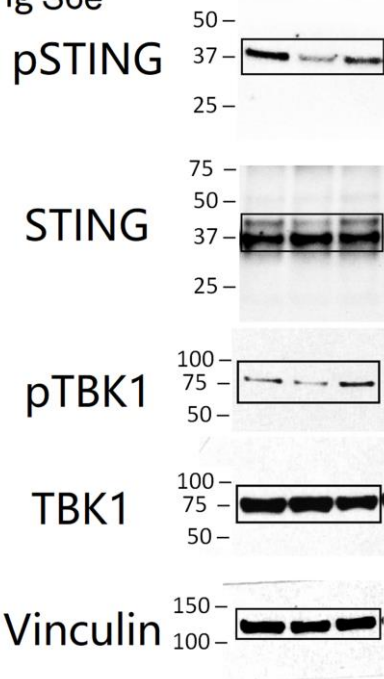

Supplement: EMS117976-supplement-Unprocessed_Immunoblots_ED_Fig_6.pdf [file EMS117976-supplement-Unprocessed_Immunoblots_ED_Fig_6.pdf]

Fig S7a

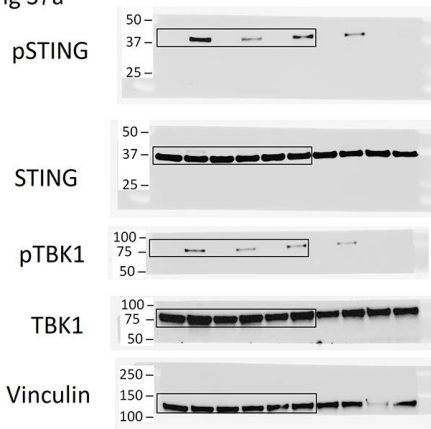

Fig S7b

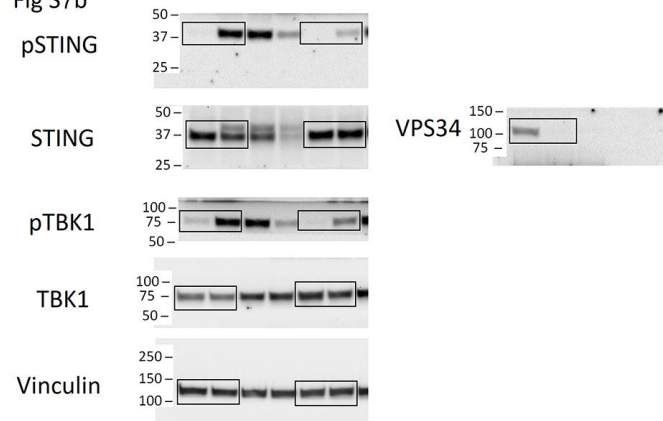

Fig S7d

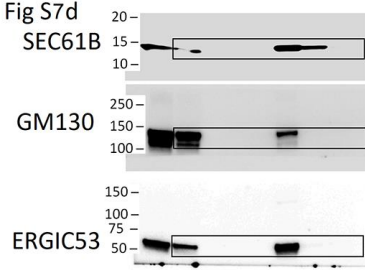

Supplement: EMS117976-supplement-Unprocessed_Immunoblots_ED_Fig_7.pdf [file EMS117976-supplement-Unprocessed_Immunoblots_ED_Fig_7.pdf]

Fig 1g

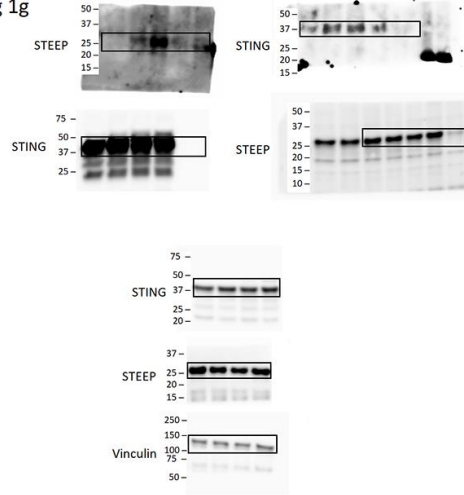

Fig 1h

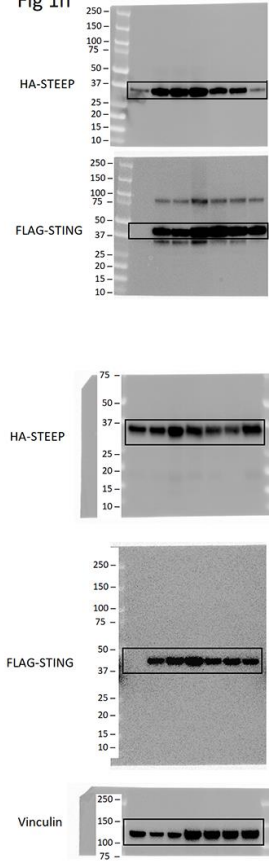

Fig 1i

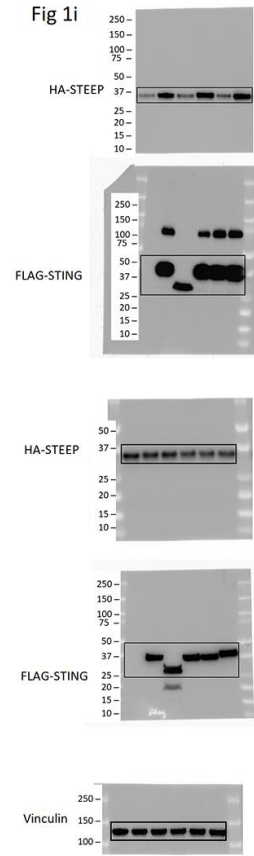

Supplement: EMS117976-supplement-Unprocessed_Immunoblots_Fig1.pdf [file EMS117976-supplement-Unprocessed_Immunoblots_Fig1.pdf]

Fig 2h

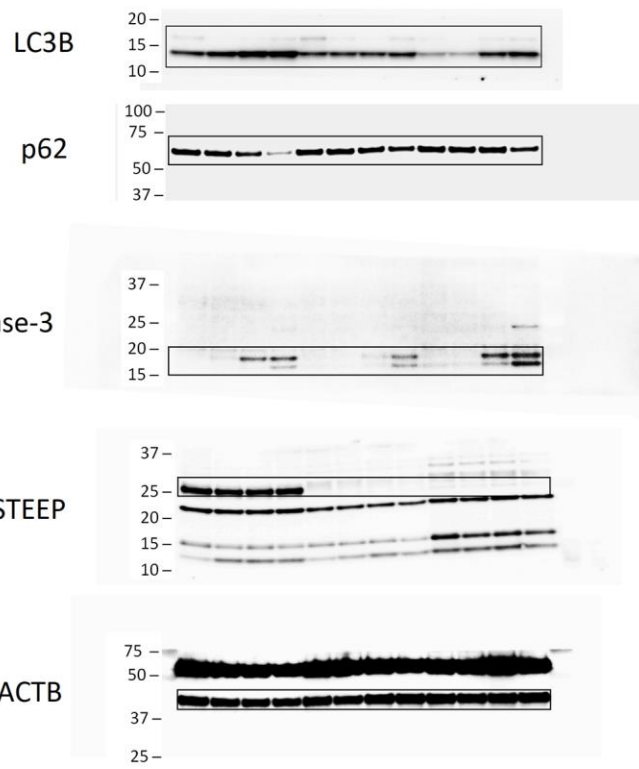

Supplement: EMS117976-supplement-Unprocessed_Immunoblots_Fig_2.pdf [file EMS117976-supplement-Unprocessed_Immunoblots_Fig_2.pdf]

Fig 3a

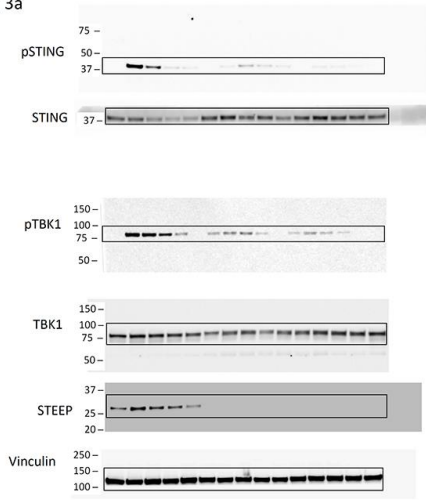

Fig 3b

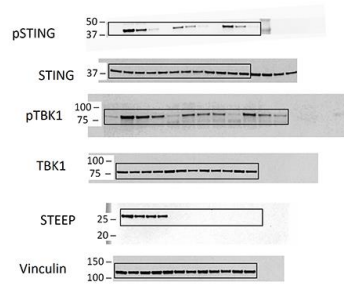

Fig 3d

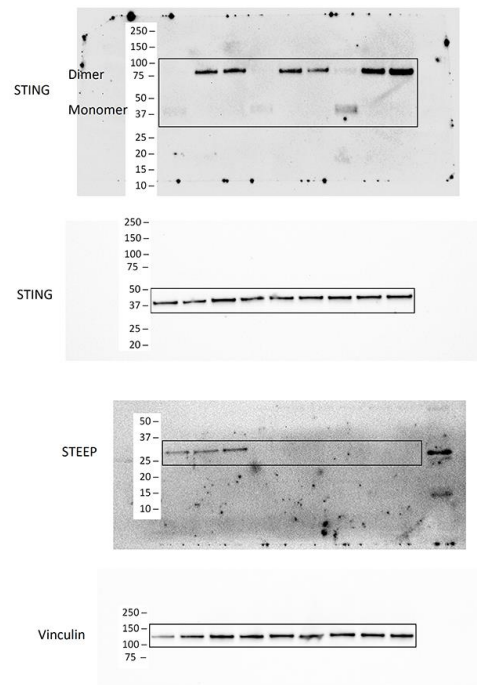

Fig 3c

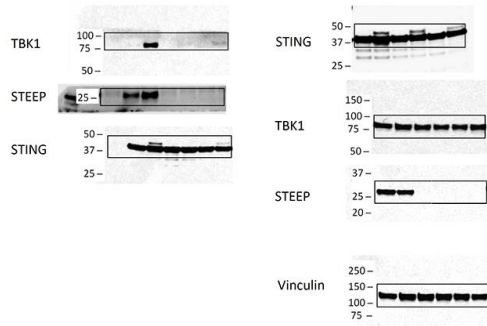

Fig 3e

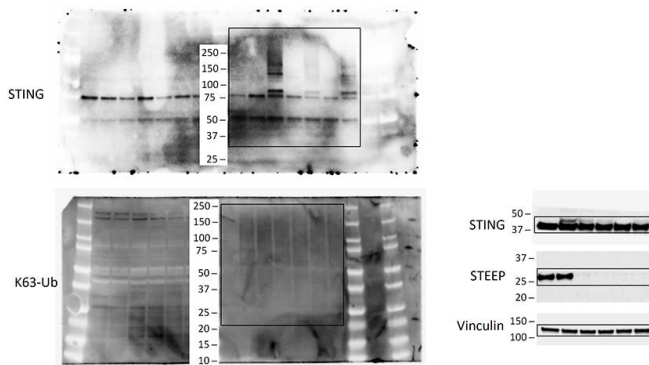

Fig 3f

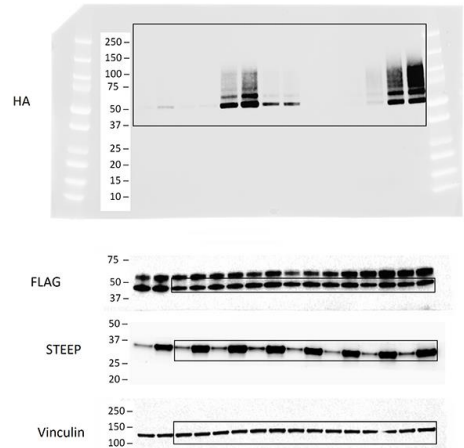

Supplement: EMS117976-supplement-Unprocessed_Immunoblots_Fig_3.pdf [file EMS117976-supplement-Unprocessed_Immunoblots_Fig_3.pdf]

Fig 4b

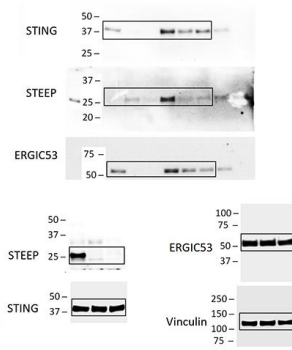

Fig 4g

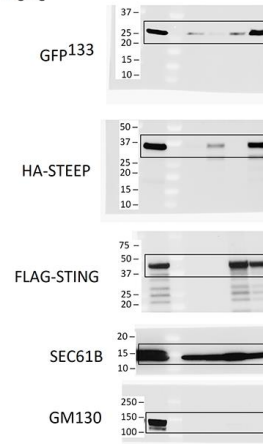

Fig 4d

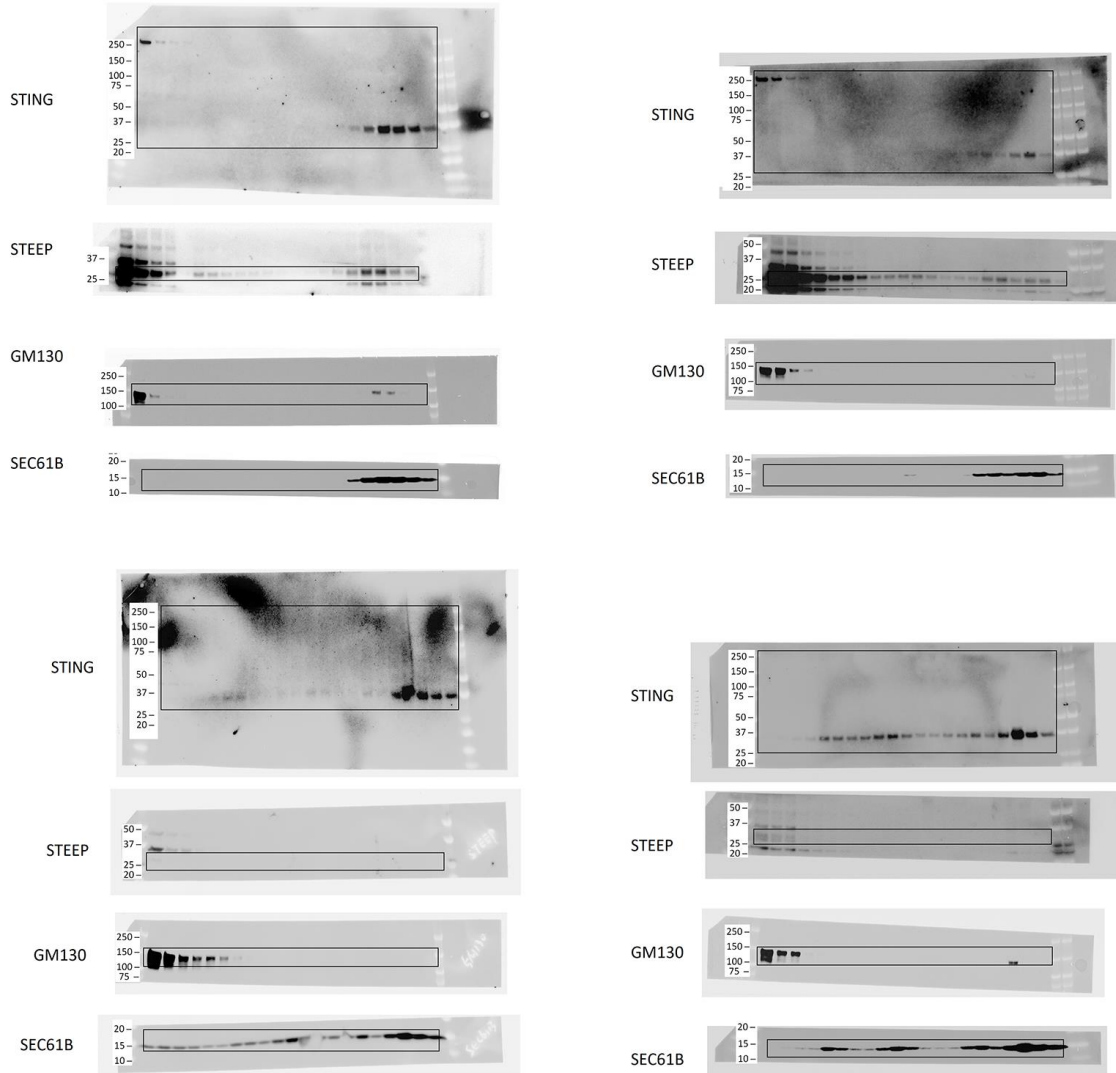

Supplement: EMS117976-supplement-Unprocessed_Immunoblots_Fig_4.pdf [file EMS117976-supplement-Unprocessed_Immunoblots_Fig_4.pdf]

Fig 5c

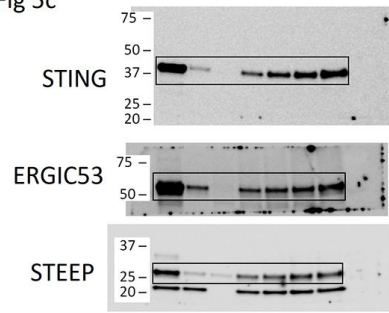

Fig 5d

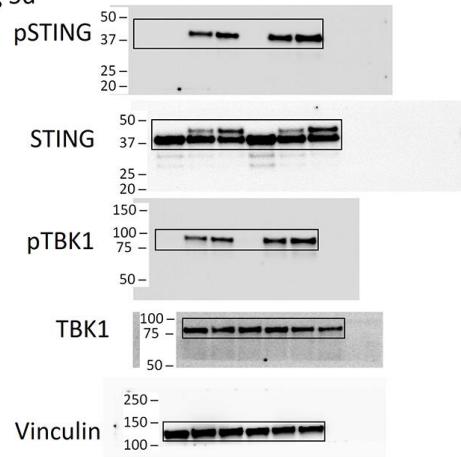

Supplement: EMS117976-supplement-Unprocessed_Immunoblots_Fig_5.pdf [file EMS117976-supplement-Unprocessed_Immunoblots_Fig_5.pdf]

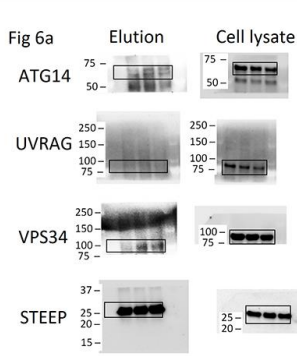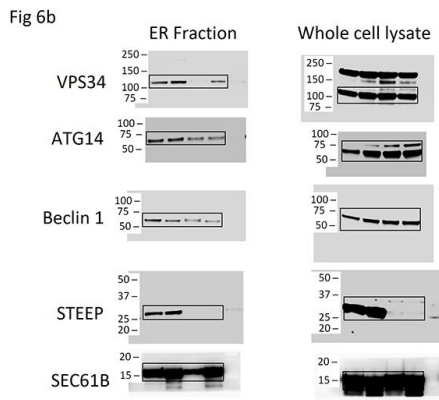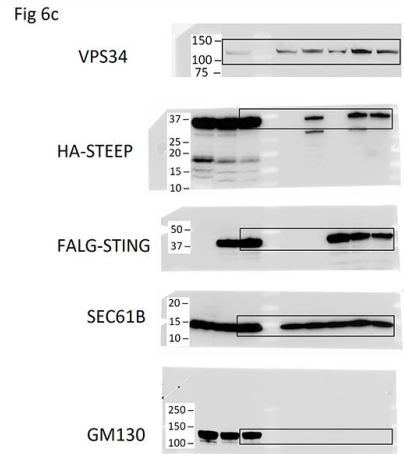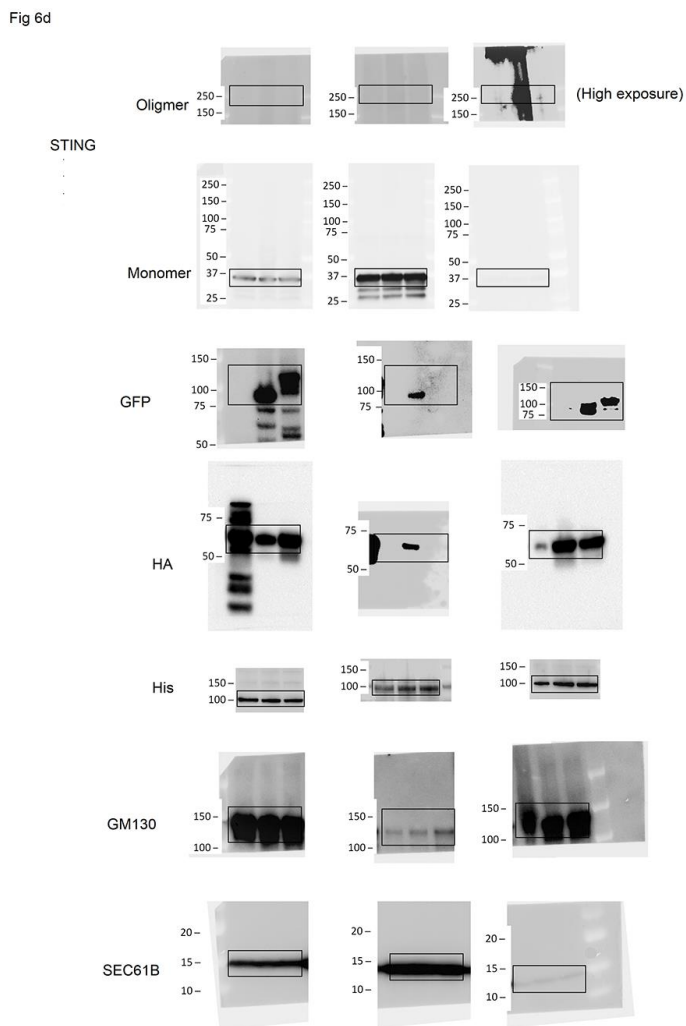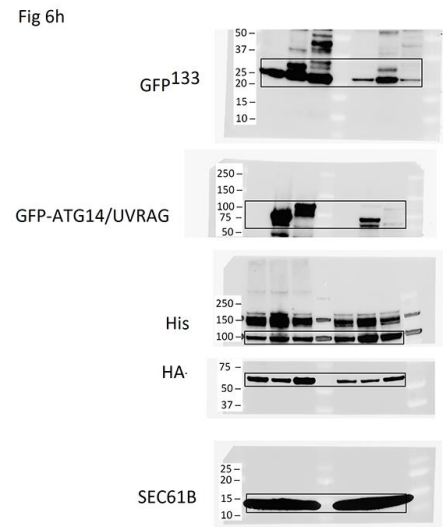

Supplement: EMS117976-supplement-Unprocessed_Immunoblots_Fig_6.pdf [file EMS117976-supplement-Unprocessed_Immunoblots_Fig_6.pdf]

Fig 7d

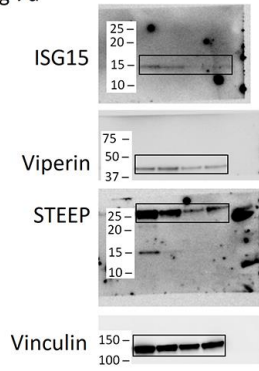

Fig 7e

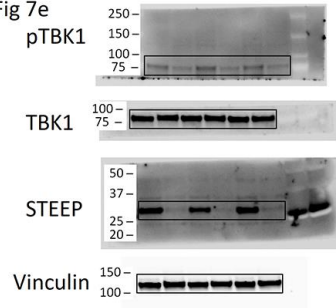

Fig 7h

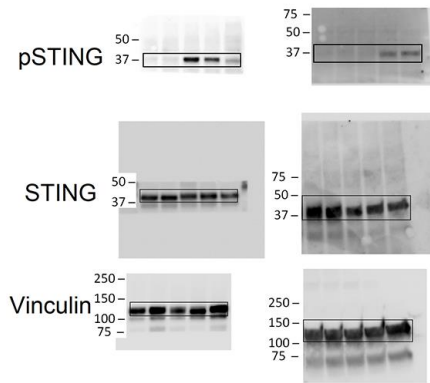

Fig 7k

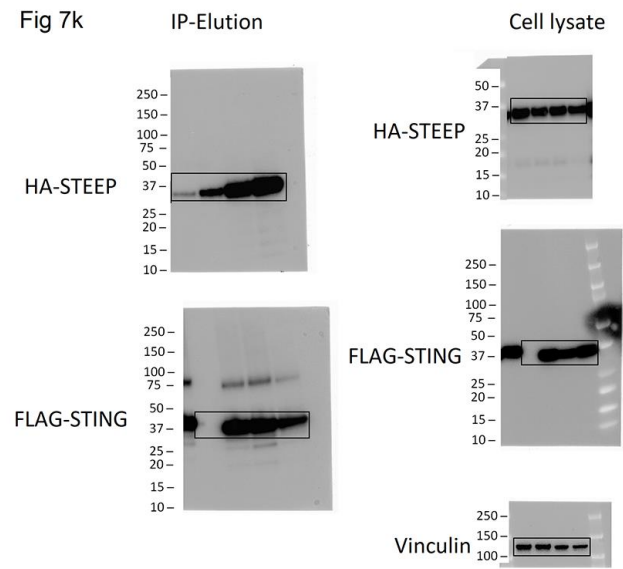

Supplement: EMS117976-supplement-Unprocessed_Immunoblots_Fig_7.pdf [file EMS117976-supplement-Unprocessed_Immunoblots_Fig_7.pdf]
